# Supplementary material
Source: publisher site journal article supplement (https://www.dovepress.com/article/325300)
Supplement: Supplementary file 1 [file get_supplementary_file.php]

Table S1

miRNAs related to interested clinical traits

| module | clinical traits | miRNA | Gene Significance (GS) |
| --- | --- | --- | --- |
| royalblue | COPD status moderate | hsa-miR-587 | 0.30 |
| royalblue | COPD status moderate | hsa-miR-412 | 0.29 |
| royalblue | COPD status moderate | hsa-miR-520f | 0.28 |
| royalblue | FEV1 Predicted | hsa-miR-558 | 0.53 |
| royalblue | FEV1 Predicted | hsa-miR-587 | 0.49 |
| royalblue | FEV1 Predicted | hsa-miR-621 | 0.47 |
| royalblue | Smoke Pack Year | hsa-miR-526c | 0.40 |
| royalblue | Smoke Pack Year | hsa-miR-623 | 0.38 |
| royalblue | Smoke Pack Year | hsa-miR-520e | 0.38 |
| lightyellow | COPD Status moderate | hsa-miR-560 | 0.57 |
| Lightyellow | COPD Status moderate | hsa-miR-639 | 0.56 |
| Lightyellow | COPD Status moderate | hsa-miR-566 | 0.56 |
| Lightyellow | FEV1 Predicted | hsa-miR-560 | 0.50 |
| Lightyellow | FEV1 Predicted | hsa-miR-671 | 0.46 |
| Lightyellow | FEV1 Predicted | hsa-miR-363 | 0.49 |
| Lightyellow | Smoke Pack Year | hsa-miR-129 | 0.37 |
| Lightyellow | Smoke Pack Year | hsa-miR-411 | 0.33 |
| lightyellow | Smoke Pack Year | hsa-miR-372 | 0.30 |
| Grey60 | COPD Status moderate | hsa-miR-191 | 0.47 |
| Grey60 | COPD Status moderate | hsa-miR-133a | 0.43 |
| Grey60 | COPD Status moderate | hsa-miR-149 | 0.42 |
| Grey60 | FEV1 Predicted | hsa-miR-566 | 0.47 |
| Grey60 | FEV1 Predicted | hsa-miR-635 | 0.45 |
| Grey60 | FEV1 Predicted | hsa-miR-621 | 0.44 |
| Grey60 | Smoke Pack Year | hsa-miR-766 | 0.72 |
| Grey60 | Smoke Pack Year | hsa-miR-769-3p | 0.66 |
| Grey60 | Smoke Pack Year | hsa-miR-597 | 0.65 |

Table S2

differentially expressed miRNAs from patients with moderate COPD samples compared with the samples from patients with mild COPD

| gene.id | regulate | ProbeUID | ProbeName | gene.name |
| --- | --- | --- | --- | --- |
| p6505 | up | 629 | A_25_P00010865 | hsa-miR-560 |
| p10851 | up | 629 | A_25_P00010865 | hsa-miR-560 |
| p1137 | up | 629 | A_25_P00010865 | hsa-miR-560 |
| p5808 | up | 785 | A_25_P00011458 | hsa-miR-566 |
| p9407 | up | 629 | A_25_P00010865 | hsa-miR-560 |
| p885 | up | 11 | A_25_P00010016 | hsa-miR-202 |
| p13582 | up | 1300 | A_25_P00011267 | hsa-miR-671 |
| p10532 | up | 706 | A_25_P00011269 | hsa-miR-671 |
| p9176 | up | 706 | A_25_P00011269 | hsa-miR-671 |
| p3081 | up | 706 | A_25_P00011269 | hsa-miR-671 |
| p6763 | up | 118 | A_25_P00011270 | hsa-miR-671 |
| p11954 | up | 118 | A_25_P00011270 | hsa-miR-671 |
| p1230 | up | 706 | A_25_P00011269 | hsa-miR-671 |
| p5924 | up | 118 | A_25_P00011270 | hsa-miR-671 |
| p4717 | up | 1300 | A_25_P00011267 | hsa-miR-671 |
| p1539 | up | 706 | A_25_P00011269 | hsa-miR-671 |
| p4267 | up | 1300 | A_25_P00011267 | hsa-miR-671 |
| p11656 | up | 257 | A_25_P00011027 | hsa-miR-491 |
| p3837 | up | 1300 | A_25_P00011267 | hsa-miR-671 |
| p15236 | up | 1300 | A_25_P00011267 | hsa-miR-671 |
| p170 | up | 118 | A_25_P00011270 | hsa-miR-671 |
| p14139 | up | 1148 | A_25_P00010864 | hsa-miR-560 |
| p3691 | up | 118 | A_25_P00011270 | hsa-miR-671 |
| p2284 | up | 1003 | A_25_P00010634 | hsa-miR-584 |
| p12258 | up | 629 | A_25_P00010865 | hsa-miR-560 |
| p6935 | up | 1449 | A_25_P00010246 | hsa-miR-630 |
| p1562 | up | 629 | A_25_P00010865 | hsa-miR-560 |
| p5959 | up | 1175 | A_25_P00011590 | hsa-miR-671 |
| p13920 | up | 1148 | A_25_P00010864 | hsa-miR-560 |
| p5630 | up | 1127 | A_25_P00010247 | hsa-miR-630 |
| p5548 | up | 1175 | A_25_P00011590 | hsa-miR-671 |
| p5952 | up | 1175 | A_25_P00011590 | hsa-miR-671 |
| p15487 | up | 851 | A_25_P00010798 | hsa-miR-663 |
| p13571 | up | 851 | A_25_P00010798 | hsa-miR-663 |
| p12348 | up | 641 | A_25_P00010407 | hsa-miR-409-3p |
| p7328 | up | 1453 | A_25_P00010227 | hsa-miR-623 |
| p3472 | up | 1229 | A_25_P00010727 | hsa-miR-505 |
| p14535 | up | 578 | A_25_P00010971 | hsa-miR-384 |
| p6682 | up | 1077 | A_25_P00011006 | hsa-miR-194 |
| p10963 | up | 787 | A_25_P00011009 | hsa-miR-518a |
| p2708 | up | 801 | A_25_P00011350 | hsa-miR-596 |
| p1689 | up | 851 | A_25_P00010798 | hsa-miR-663 |
| p6234 | up | 1431 | A_25_P00011048 | hsa-miR-330 |
| p12822 | up | 1449 | A_25_P00010246 | hsa-miR-630 |
| p1788 | up | 861 | A_25_P00010639 | hsa-miR-376a |
| p10545 | up | 910 | A_25_P00010800 | hsa-miR-663 |
| p3142 | up | 1030 | A_25_P00011018 | hsa-miR-136 |
| p10576 | up | 1453 | A_25_P00010227 | hsa-miR-623 |
| p12007 | up | 982 | A_25_P00010249 | hsa-miR-630 |
| p3478 | up | 851 | A_25_P00010798 | hsa-miR-663 |
| p2166 | up | 982 | A_25_P00010249 | hsa-miR-630 |
| p10392 | up | 578 | A_25_P00010971 | hsa-miR-384 |
| p7042 | up | 1503 | A_25_P00010636 | hsa-miR-584 |
| p12758 | up | 9 | A_25_P00010125 | hsa-miR-377 |
| p3601 | up | 708 | A_25_P00010840 | hsa-miR-301 |
| p6201 | up | 801 | A_25_P00011350 | hsa-miR-596 |
| p9998 | up | 1003 | A_25_P00010634 | hsa-miR-584 |
| p4377 | up | 154 | A_25_P00010334 | hsa-miR-526a |
| p8772 | up | 917 | A_25_P00010383 | hsa-miR-383 |
| p12049 | up | 1374 | A_25_P00010437 | hsa-miR-130b |
| p14799 | up | 1148 | A_25_P00010864 | hsa-miR-560 |
| p1087 | up | 298 | A_25_P00010528 | hsa-miR-206 |
| p13416 | up | 554 | A_25_P00010799 | hsa-miR-663 |
| p776 | up | 18 | A_25_P00010514 | hsa-miR-577 |
| p6587 | up | 1148 | A_25_P00010864 | hsa-miR-560 |
| p976 | up | 560 | A_25_P00010748 | hsa-miR-548a |
| p5274 | up | 1127 | A_25_P00010247 | hsa-miR-630 |
| p1999 | up | 372 | A_25_P00011386 | hsa-miR-603 |
| p8296 | up | 851 | A_25_P00010798 | hsa-miR-663 |
| p11253 | up | 801 | A_25_P00011350 | hsa-miR-596 |
| p8081 | up | 115 | A_25_P00010063 | hsa-miR-376b |
| p12224 | up | 787 | A_25_P00011009 | hsa-miR-518a |
| p15429 | up | 851 | A_25_P00010798 | hsa-miR-663 |
| p15372 | up | 816 | A_25_P00011099 | hsa-miR-659 |
| p12803 | up | 851 | A_25_P00010798 | hsa-miR-663 |
| p13181 | up | 951 | A_25_P00010626 | hsa-miR-144 |
| p8749 | up | 1539 | A_25_P00011359 | hsa-miR-657 |
| p11655 | up | 1453 | A_25_P00010227 | hsa-miR-623 |
| p1331 | up | 154 | A_25_P00010334 | hsa-miR-526a |
| p9664 | up | 1148 | A_25_P00010864 | hsa-miR-560 |
| p5678 | up | 9 | A_25_P00010125 | hsa-miR-377 |
| p7218 | up | 177 | A_25_P00010926 | hsa-miR-215 |
| gene.id | regulate | ProbeUID | ProbeName | gene.name |
| p12412 | down | 1151 | A_25_P00010658 | hsa-miR-503 |
| p6118 | down | 278 | A_25_P00010161 | hsa-miR-371 |
| p10626 | down | 574 | A_25_P00011944 | hsa-miR-639 |
| p10063 | down | 802 | A_25_P00010850 | hsa-miR-149 |
| p11919 | down | 1124 | A_25_P00010952 | hsa-miR-18b |
| p1535 | down | 802 | A_25_P00010850 | hsa-miR-149 |
| p10708 | down | 176 | A_25_P00010427 | hsa-miR-519c |
| p3862 | down | 560 | A_25_P00010748 | hsa-miR-548a |
| p5679 | down | 310 | A_25_P00010385 | hsa-miR-383 |
| p11313 | down | 1423 | A_25_P00011427 | hsa-miR-563 |
| p8016 | down | 802 | A_25_P00010850 | hsa-miR-149 |
| p10697 | down | 906 | A_25_P00010379 | hsa-miR-323 |
| p3232 | down | 1116 | A_25_P00010190 | hsa-miR-133a |
| p4927 | down | 1184 | A_25_P00010964 | hsa-miR-133b |
| p10966 | down | 311 | A_25_P00010624 | hsa-miR-514 |
| p13637 | down | 1184 | A_25_P00010964 | hsa-miR-133b |
| p10808 | down | 644 | A_25_P00011351 | hsa-miR-596 |
| p11942 | down | 661 | A_25_P00011345 | hsa-miR-767-5p |
| p1430 | down | 363 | A_25_P00011072 | hsa-miR-409-5p |
| p2770 | down | 1116 | A_25_P00010190 | hsa-miR-133a |
| p14668 | down | 620 | A_25_P00010199 | hsa-miR-410 |
| p4108 | down | 14 | A_25_P00010023 | hsa-miR-369-3p |
| p6784 | down | 1348 | A_25_P00010963 | hsa-miR-133b |
| p15108 | down | 1348 | A_25_P00010963 | hsa-miR-133b |
| p4436 | down | 1013 | A_25_P00011236 | hsa-miR-612 |
| p9529 | down | 1348 | A_25_P00010963 | hsa-miR-133b |
| p10011 | down | 110 | A_25_P00010955 | hsa-miR-1 |
| p14756 | down | 664 | A_25_P00010292 | hsa-miR-524 |
| p12740 | down | 1116 | A_25_P00010190 | hsa-miR-133a |
| p915 | down | 513 | A_25_P00010191 | hsa-miR-133a |
| p10233 | down | 1116 | A_25_P00010190 | hsa-miR-133a |
| p10073 | down | 1116 | A_25_P00010190 | hsa-miR-133a |
| p10175 | down | 513 | A_25_P00010191 | hsa-miR-133a |
| p11699 | down | 586 | A_25_P00011388 | hsa-miR-562 |
| p13751 | down | 133 | A_25_P00010411 | hsa-miR-582 |
| p4836 | down | 1348 | A_25_P00010963 | hsa-miR-133b |
| p9510 | down | 475 | A_25_P00010041 | hsa-miR-363 |
| p12918 | down | 1111 | A_25_P00010163 | hsa-miR-302d |
| p6671 | down | 1033 | A_25_P00010618 | hsa-miR-302b |
| p3287 | down | 316 | A_25_P00010343 | hsa-miR-219 |
| p9707 | down | 1099 | A_25_P00010235 | hsa-miR-516-3p |
| p4929 | down | 1184 | A_25_P00010964 | hsa-miR-133b |
| p8430 | down | 1348 | A_25_P00010963 | hsa-miR-133b |
| p8940 | down | 1348 | A_25_P00010963 | hsa-miR-133b |
| p6899 | down | 221 | A_25_P00010020 | hsa-miR-329 |
| p4164 | down | 1023 | A_25_P00010331 | hsa-miR-525 |
| p6343 | down | 906 | A_25_P00010379 | hsa-miR-323 |
| p10589 | down | 513 | A_25_P00010191 | hsa-miR-133a |
| p11590 | down | 578 | A_25_P00010971 | hsa-miR-384 |
| p10923 | down | 1184 | A_25_P00010964 | hsa-miR-133b |
| p1066 | down | 637 | A_25_P00010366 | hsa-miR-549 |
| p3124 | down | 1188 | A_25_P00010081 | hsa-miR-520c |
| p6073 | down | 1184 | A_25_P00010964 | hsa-miR-133b |
| p12279 | down | 1116 | A_25_P00010190 | hsa-miR-133a |
| p8106 | down | 1347 | A_25_P00010587 | hsa-miR-382 |
| p10178 | down | 1073 | A_25_P00010400 | hsa-miR-204 |
| p6288 | down | 569 | A_25_P00010671 | hsa-miR-326 |
| p3773 | down | 513 | A_25_P00010191 | hsa-miR-133a |
| p14988 | down | 129 | A_25_P00010183 | hsa-miR-381 |
| p1902 | down | 361 | A_25_P00011217 | hsa-miR-520f |
| p1993 | down | 513 | A_25_P00010191 | hsa-miR-133a |
| p12471 | down | 836 | A_25_P00010568 | hsa-miR-523 |
| p3121 | down | 674 | A_25_P00010222 | hsa-miR-449 |
| p11475 | down | 72 | A_25_P00010017 | hsa-miR-495 |
| p6831 | down | 1499 | A_25_P00011361 | hsa-miR-643 |
| p10245 | down | 1178 | A_25_P00011606 | hsa-miR-651 |
| p11247 | down | 458 | A_25_P00011056 | hsa-miR-624 |
| p8237 | down | 647 | A_25_P00010981 | hsa-miR-135a |
| p5978 | down | 647 | A_25_P00010981 | hsa-miR-135a |
| p4409 | down | 1333 | A_25_P00011003 | hsa-miR-9 |
| p3874 | down | 1288 | A_25_P00010018 | hsa-miR-495 |
| p6707 | down | 538 | A_25_P00010352 | hsa-miR-517 |
| p5406 | down | 1391 | A_25_P00010993 | hsa-miR-645 |
| p12183 | down | 1347 | A_25_P00010587 | hsa-miR-382 |
| p757 | down | 427 | A_25_P00010693 | hsa-miR-512-5p |
| p7820 | down | 1488 | A_25_P00010181 | hsa-miR-325 |
| p15256 | down | 757 | A_25_P00010109 | hsa-miR-145 |
| p3119 | down | 1184 | A_25_P00010964 | hsa-miR-133b |
| p5811 | down | 1391 | A_25_P00010993 | hsa-miR-645 |
| p6756 | down | 397 | A_25_P00010406 | hsa-miR-211 |
| p178 | down | 129 | A_25_P00010183 | hsa-miR-381 |
| p13619 | down | 60 | A_25_P00010486 | hsa-miR-135b |
| p14322 | down | 1458 | A_25_P00010123 | hsa-miR-548b |
| p6298 | down | 587 | A_25_P00010763 | hsa-miR-147 |
| p11226 | down | 101 | A_25_P00010506 | hsa-miR-302c |
| p3836 | down | 322 | A_25_P00010849 | hsa-miR-149 |
| p11314 | down | 383 | A_25_P00010450 | hsa-miR-620 |
| p9266 | down | 513 | A_25_P00010191 | hsa-miR-133a |
| p7712 | down | 757 | A_25_P00010109 | hsa-miR-145 |
| p1252 | down | 619 | A_25_P00010176 | hsa-miR-518e |
| p2587 | down | 802 | A_25_P00010850 | hsa-miR-149 |
| p2427 | down | 1035 | A_25_P00011228 | hsa-miR-655 |
| p1395 | down | 707 | A_25_P00010743 | hsa-miR-548c |
| p10976 | down | 110 | A_25_P00010955 | hsa-miR-1 |
| p8279 | down | 1498 | A_25_P00010031 | hsa-miR-337 |
| p9729 | down | 1401 | A_25_P00010775 | hsa-miR-449b |
| p13100 | down | 513 | A_25_P00010191 | hsa-miR-133a |
| p5055 | down | 1150 | A_25_P00010051 | hsa-miR-517a |
| p7111 | down | 876 | A_25_P00010754 | hsa-miR-129 |
| p5249 | down | 757 | A_25_P00010109 | hsa-miR-145 |
| p14055 | down | 551 | A_25_P00010536 | hsa-miR-302c |
| p4619 | down | 1348 | A_25_P00010963 | hsa-miR-133b |
| p11822 | down | 110 | A_25_P00010955 | hsa-miR-1 |
| p8109 | down | 845 | A_25_P00010110 | hsa-miR-145 |
| p13007 | down | 220 | A_25_P00011058 | hsa-miR-598 |
| p427 | down | 241 | A_25_P00011629 | hsa-miR-563 |
| p4388 | down | 1348 | A_25_P00010963 | hsa-miR-133b |
| p7724 | down | 1184 | A_25_P00010964 | hsa-miR-133b |
| p11161 | down | 1116 | A_25_P00010190 | hsa-miR-133a |
| p1766 | down | 845 | A_25_P00010110 | hsa-miR-145 |
| p5535 | down | 316 | A_25_P00010343 | hsa-miR-219 |
| p2644 | down | 60 | A_25_P00010486 | hsa-miR-135b |
| p4763 | down | 1116 | A_25_P00010190 | hsa-miR-133a |
| p584 | down | 322 | A_25_P00010849 | hsa-miR-149 |
| p13745 | down | 1071 | A_25_P00010160 | hsa-miR-371 |
| p5925 | down | 632 | A_25_P00010736 | hsa-miR-548d |
| p15649 | down | 845 | A_25_P00010110 | hsa-miR-145 |
| p11108 | down | 845 | A_25_P00010110 | hsa-miR-145 |
| p13145 | down | 14 | A_25_P00010023 | hsa-miR-369-3p |
| p2123 | down | 889 | A_25_P00010310 | hsa-miR-544 |
| p6158 | down | 765 | A_25_P00010890 | hsa-miR-519a |
| p219 | down | 172 | A_25_P00010373 | hsa-miR-640 |
| p11169 | down | 1437 | A_25_P00010417 | hsa-miR-504 |
| p12869 | down | 757 | A_25_P00010109 | hsa-miR-145 |
| p10235 | down | 1185 | A_25_P00010375 | hsa-miR-615 |
| p8466 | down | 1482 | A_25_P00010749 | hsa-miR-548a |
| p7881 | down | 845 | A_25_P00010110 | hsa-miR-145 |
| p1386 | down | 757 | A_25_P00010109 | hsa-miR-145 |
| p5575 | down | 674 | A_25_P00010222 | hsa-miR-449 |
| p1005 | down | 586 | A_25_P00011388 | hsa-miR-562 |
| p43 | down | 61 | A_25_P00011626 | hsa-miR-586 |
| p11686 | down | 1119 | A_25_P00010620 | hsa-miR-302b |
| p7363 | down | 556 | A_25_P00011366 | hsa-miR-573 |
| p10421 | down | 573 | A_25_P00011347 | hsa-miR-767-5p |
| p10931 | down | 513 | A_25_P00010191 | hsa-miR-133a |
| p13794 | down | 757 | A_25_P00010109 | hsa-miR-145 |
| p11607 | down | 537 | A_25_P00011403 | hsa-miR-644 |
| p7077 | down | 1413 | A_25_P00010566 | hsa-miR-523 |
| p5633 | down | 1251 | A_25_P00011375 | hsa-miR-649 |
| p4582 | down | 777 | A_25_P00010201 | hsa-miR-520a |
| p15260 | down | 110 | A_25_P00010955 | hsa-miR-1 |
| p13053 | down | 367 | A_25_P00011089 | hsa-miR-124a |
| p12786 | down | 633 | A_25_P00010127 | hsa-miR-122a |
| p10280 | down | 1047 | A_25_P00010426 | hsa-miR-217 |
| p7396 | down | 1377 | A_25_P00011050 | hsa-miR-589 |
| p12360 | down | 574 | A_25_P00011944 | hsa-miR-639 |
| p5525 | down | 876 | A_25_P00010754 | hsa-miR-129 |
| p2178 | down | 479 | A_25_P00010988 | hsa-miR-153 |
| p12990 | down | 383 | A_25_P00010450 | hsa-miR-620 |
| p13565 | down | 71 | A_25_P00010061 | hsa-miR-376b |
| p8323 | down | 1383 | A_25_P00010903 | hsa-miR-611 |
| p822 | down | 499 | A_25_P00010309 | hsa-miR-544 |
| p2682 | down | 60 | A_25_P00010486 | hsa-miR-135b |
| p1494 | down | 322 | A_25_P00010849 | hsa-miR-149 |
| p15620 | down | 845 | A_25_P00010110 | hsa-miR-145 |
| p1081 | down | 582 | A_25_P00010369 | hsa-miR-346 |
| p10202 | down | 578 | A_25_P00010971 | hsa-miR-384 |
| p14794 | down | 655 | A_25_P00010958 | hsa-miR-502 |
| p7649 | down | 1188 | A_25_P00010081 | hsa-miR-520c |
| p12669 | down | 89 | A_25_P00010972 | hsa-miR-450 |
| p9872 | down | 1243 | A_25_P00010649 | hsa-miR-551b |
| p7461 | down | 767 | A_25_P00011126 | hsa-miR-542-3p |
| p12457 | down | 479 | A_25_P00010988 | hsa-miR-153 |
| p7877 | down | 322 | A_25_P00010849 | hsa-miR-149 |
| p918 | down | 515 | A_25_P00010632 | hsa-miR-571 |
| p7146 | down | 440 | A_25_P00011241 | hsa-miR-616 |
| p13699 | down | 797 | A_25_P00010756 | hsa-miR-34c |
| p2608 | down | 394 | A_25_P00010538 | hsa-miR-302c |
| p4489 | down | 60 | A_25_P00010486 | hsa-miR-135b |
| p1336 | down | 14 | A_25_P00010023 | hsa-miR-369-3p |
| p13034 | down | 384 | A_25_P00010265 | hsa-miR-608 |
| p14350 | down | 933 | A_25_P00010446 | hsa-miR-299-5p |
| p4950 | down | 1179 | A_25_P00010337 | hsa-miR-483 |
| p9484 | down | 1116 | A_25_P00010190 | hsa-miR-133a |
| p6870 | down | 725 | A_25_P00011390 | hsa-miR-562 |
| p8714 | down | 69 | A_25_P00010733 | hsa-miR-138 |
| p12425 | down | 130 | A_25_P00010488 | hsa-miR-518c |
| p5399 | down | 119 | A_25_P00011001 | hsa-miR-9 |
| p14099 | down | 1519 | A_25_P00011480 | hsa-miR-552 |
| p5688 | down | 390 | A_25_P00010312 | hsa-miR-544 |
| p1819 | down | 757 | A_25_P00010109 | hsa-miR-145 |
| p6977 | down | 587 | A_25_P00010763 | hsa-miR-147 |
| p12033 | down | 110 | A_25_P00010955 | hsa-miR-1 |
| p8442 | down | 595 | A_25_P00010764 | hsa-miR-147 |
| p1248 | down | 101 | A_25_P00010506 | hsa-miR-302c |
| p4117 | down | 485 | A_25_P00010984 | hsa-miR-367 |
| p12182 | down | 797 | A_25_P00010756 | hsa-miR-34c |
| p7646 | down | 1348 | A_25_P00010963 | hsa-miR-133b |
| p1085 | down | 584 | A_25_P00011615 | hsa-miR-657 |
| p6322 | down | 103 | A_25_P00010315 | hsa-miR-9 |
| p7165 | down | 513 | A_25_P00010191 | hsa-miR-133a |
| p2346 | down | 176 | A_25_P00010427 | hsa-miR-519c |
| p6101 | down | 129 | A_25_P00010183 | hsa-miR-381 |
| p7566 | down | 192 | A_25_P00010361 | hsa-miR-485-3p |
| p10752 | down | 1328 | A_25_P00011297 | hsa-miR-569 |
| p2578 | down | 1071 | A_25_P00010160 | hsa-miR-371 |
| p9250 | down | 757 | A_25_P00010109 | hsa-miR-145 |
| p8225 | down | 1459 | A_25_P00010685 | hsa-miR-452 |
| p2675 | down | 917 | A_25_P00010383 | hsa-miR-383 |
| p6486 | down | 853 | A_25_P00010025 | hsa-miR-302a |
| p12821 | down | 18 | A_25_P00010514 | hsa-miR-577 |
| p11685 | down | 1124 | A_25_P00010952 | hsa-miR-18b |
| p2938 | down | 835 | A_25_P00010487 | hsa-miR-518c |
| p7862 | down | 1157 | A_25_P00010138 | hsa-miR-208 |
| p7251 | down | 1394 | A_25_P00011327 | hsa-miR-651 |
| p9377 | down | 1082 | A_25_P00011627 | hsa-miR-613 |
| p3880 | down | 1292 | A_25_P00011124 | hsa-miR-633 |
| p9938 | down | 1104 | A_25_P00011380 | hsa-miR-641 |
| p10969 | down | 669 | A_25_P00011271 | hsa-miR-637 |
| p4040 | down | 1308 | A_25_P00010268 | hsa-miR-412 |
| p430 | down | 14 | A_25_P00010023 | hsa-miR-369-3p |
| p6884 | down | 595 | A_25_P00010764 | hsa-miR-147 |
| p13510 | down | 1293 | A_25_P00011295 | hsa-miR-561 |
| p6096 | down | 578 | A_25_P00010971 | hsa-miR-384 |
| p6121 | down | 110 | A_25_P00010955 | hsa-miR-1 |
| p10745 | down | 14 | A_25_P00010023 | hsa-miR-369-3p |
| p539 | down | 289 | A_25_P00010103 | hsa-miR-299-3p |
| p5602 | down | 701 | A_25_P00010159 | hsa-miR-433 |
| p1989 | down | 930 | A_25_P00011591 | hsa-miR-618 |
| p2981 | down | 943 | A_25_P00011112 | hsa-miR-507 |
| p2649 | down | 954 | A_25_P00010092 | hsa-miR-487a |
| p4650 | down | 51 | A_25_P00010284 | hsa-miR-362 |
| p7488 | down | 1366 | A_25_P00010669 | hsa-miR-326 |
| p672 | down | 423 | A_25_P00010128 | hsa-miR-122a |
| p9229 | down | 654 | A_25_P00010638 | hsa-miR-376a |
| p10111 | down | 227 | A_25_P00010282 | hsa-let-7d |
| p1278 | down | 275 | A_25_P00010239 | hsa-miR-190 |
| p4722 | down | 316 | A_25_P00010343 | hsa-miR-219 |
| p11129 | down | 1179 | A_25_P00010337 | hsa-miR-483 |
| p9324 | down | 421 | A_25_P00010525 | hsa-miR-196a |
| p15333 | down | 711 | A_25_P00010328 | hsa-miR-520a |
| p3242 | down | 561 | A_25_P00010258 | hsa-miR-372 |
| p13577 | down | 8 | A_25_P00011941 | hsa-miR-517b |
| p3331 | down | 1230 | A_25_P00010269 | hsa-miR-412 |
| p15490 | down | 1483 | A_25_P00011374 | hsa-miR-649 |
| p11234 | down | 1167 | A_25_P00011391 | hsa-miR-562 |
| p10444 | down | 220 | A_25_P00011058 | hsa-miR-598 |
| p5567 | down | 936 | A_25_P00010726 | hsa-miR-505 |
| p9896 | down | 750 | A_25_P00011958 | hsa-miR-579 |
| p13192 | down | 782 | A_25_P00010156 | hsa-miR-373 |
| p10885 | down | 1459 | A_25_P00010685 | hsa-miR-452 |
| p6488 | down | 310 | A_25_P00010385 | hsa-miR-383 |
| p7753 | down | 1401 | A_25_P00010775 | hsa-miR-449b |
| p1304 | down | 161 | A_25_P00010075 | hsa-miR-520d |
| p8594 | down | 1423 | A_25_P00011427 | hsa-miR-563 |
| p14312 | down | 802 | A_25_P00010850 | hsa-miR-149 |
| p8542 | down | 1448 | A_25_P00011400 | hsa-miR-646 |
| p7064 | down | 1107 | A_25_P00011642 | hsa-miR-559 |
| p12682 | down | 1366 | A_25_P00010669 | hsa-miR-326 |
| p11086 | down | 711 | A_25_P00010328 | hsa-miR-520a |
| p8004 | down | 959 | A_25_P00011397 | hsa-miR-454-5p |
| p13889 | down | 275 | A_25_P00010239 | hsa-miR-190 |
| p10470 | down | 666 | A_25_P00010755 | hsa-miR-34c |
| p10819 | down | 488 | A_25_P00010259 | hsa-miR-372 |
| p7875 | down | 797 | A_25_P00010756 | hsa-miR-34c |
| p1905 | down | 881 | A_25_P00011963 | hsa-miR-646 |
| p5862 | down | 315 | A_25_P00010244 | hsa-miR-518b |
| p6432 | down | 1437 | A_25_P00010417 | hsa-miR-504 |
| p2878 | down | 479 | A_25_P00010988 | hsa-miR-153 |
| p8013 | down | 5 | A_25_P00010390 | hsa-miR-30b |
| p10451 | down | 367 | A_25_P00011089 | hsa-miR-124a |
| p8169 | down | 1342 | A_25_P00010169 | hsa-miR-520g |
| p7946 | down | 1502 | A_25_P00011075 | hsa-miR-33b |
| p4540 | down | 436 | A_25_P00011221 | hsa-miR-553 |
| p11477 | down | 1297 | A_25_P00011299 | hsa-miR-767-3p |
| p7285 | down | 1419 | A_25_P00011414 | hsa-miR-635 |
| p7486 | down | 581 | A_25_P00011114 | hsa-miR-507 |
| p12205 | down | 282 | A_25_P00010480 | hsa-miR-125a |
| p3411 | down | 530 | A_25_P00011942 | hsa-miR-520f |
| p9161 | down | 5 | A_25_P00010390 | hsa-miR-30b |
| p513 | down | 332 | A_25_P00010380 | hsa-miR-656 |
| p10590 | down | 835 | A_25_P00010487 | hsa-miR-518c |
| p8580 | down | 110 | A_25_P00010955 | hsa-miR-1 |
| p13813 | down | 797 | A_25_P00010756 | hsa-miR-34c |
| p15273 | down | 1273 | A_25_P00010325 | hsa-miR-527 |
| p7348 | down | 1181 | A_25_P00010706 | hsa-miR-485-5p |
| p2383 | down | 1014 | A_25_P00010962 | hsa-miR-585 |
| p14217 | down | 1351 | A_25_P00010384 | hsa-miR-383 |
| p4190 | down | 613 | A_25_P00011415 | hsa-miR-635 |
| p4420 | down | 109 | A_25_P00010362 | hsa-miR-609 |
| p1802 | down | 282 | A_25_P00010480 | hsa-miR-125a |
| p3945 | down | 1267 | A_25_P00010336 | hsa-miR-483 |
| p14470 | down | 163 | A_25_P00011251 | hsa-miR-578 |
| p10261 | down | 513 | A_25_P00010191 | hsa-miR-133a |
| p6900 | down | 479 | A_25_P00010988 | hsa-miR-153 |
| p4045 | down | 1309 | A_25_P00010943 | hsa-miR-567 |
| p13942 | down | 322 | A_25_P00010849 | hsa-miR-149 |
| p2684 | down | 1114 | A_25_P00010484 | hsa-miR-216 |
| p9552 | down | 551 | A_25_P00010536 | hsa-miR-302c |
| p14687 | down | 1156 | A_25_P00010093 | hsa-miR-492 |
| p6290 | down | 385 | A_25_P00010628 | hsa-miR-203 |
| p11032 | down | 640 | A_25_P00010137 | hsa-miR-208 |
| p4576 | down | 1080 | A_25_P00011389 | hsa-miR-562 |
| p4345 | down | 60 | A_25_P00010486 | hsa-miR-135b |
| p4748 | down | 797 | A_25_P00010756 | hsa-miR-34c |
| p6936 | down | 110 | A_25_P00010955 | hsa-miR-1 |
| p9869 | down | 666 | A_25_P00010755 | hsa-miR-34c |
| p8522 | down | 282 | A_25_P00010480 | hsa-miR-125a |
| p1253 | down | 654 | A_25_P00010638 | hsa-miR-376a |
| p10017 | down | 1154 | A_25_P00010013 | hsa-miR-368 |
| p10146 | down | 322 | A_25_P00010849 | hsa-miR-149 |
| p15324 | down | 1428 | A_25_P00010725 | hsa-miR-505 |
| p3146 | down | 1197 | A_25_P00010234 | hsa-miR-516-3p |
| p9820 | down | 933 | A_25_P00010446 | hsa-miR-299-5p |
| p8447 | down | 845 | A_25_P00010110 | hsa-miR-145 |
| p1637 | down | 60 | A_25_P00010486 | hsa-miR-135b |
| p4890 | down | 104 | A_25_P00010476 | hsa-miR-545 |
| p11423 | down | 879 | A_25_P00010728 | hsa-miR-92b |
| p1706 | down | 860 | A_25_P00010776 | hsa-miR-449b |
| p13361 | down | 823 | A_25_P00010524 | hsa-miR-196b |
| p4460 | down | 1366 | A_25_P00010669 | hsa-miR-326 |
| p8552 | down | 666 | A_25_P00010755 | hsa-miR-34c |
| p1238 | down | 644 | A_25_P00011351 | hsa-miR-596 |
| p383 | down | 282 | A_25_P00010480 | hsa-miR-125a |
| p9637 | down | 647 | A_25_P00010981 | hsa-miR-135a |
| p1028 | down | 608 | A_25_P00010077 | hsa-miR-181d |
| p11574 | down | 1188 | A_25_P00010081 | hsa-miR-520c |
| p5354 | down | 447 | A_25_P00011377 | hsa-miR-600 |
| p5528 | down | 76 | A_25_P00010011 | hsa-miR-519b |
| p13220 | down | 980 | A_25_P00010828 | hsa-miR-30a-3p |
| p14428 | down | 1043 | A_25_P00010170 | hsa-miR-520g |
| p5779 | down | 212 | A_25_P00010122 | hsa-miR-548b |
| p10116 | down | 1367 | A_25_P00010129 | hsa-miR-497 |
| p11288 | down | 1136 | A_25_P00010950 | hsa-miR-224 |
| p10883 | down | 60 | A_25_P00010486 | hsa-miR-135b |
| p759 | down | 430 | A_25_P00010245 | hsa-miR-518b |
| p11858 | down | 390 | A_25_P00010312 | hsa-miR-544 |
| p8712 | down | 1094 | A_25_P00010908 | hsa-miR-200b |
| p5521 | down | 340 | A_25_P00010465 | hsa-miR-34b |
| p9816 | down | 171 | A_25_P00010815 | hsa-miR-30c |
| p8047 | down | 110 | A_25_P00010955 | hsa-miR-1 |
| p3118 | down | 1124 | A_25_P00010952 | hsa-miR-18b |
| p12114 | down | 797 | A_25_P00010756 | hsa-miR-34c |
| p11535 | down | 1334 | A_25_P00011352 | hsa-miR-596 |
| p12619 | down | 1267 | A_25_P00010336 | hsa-miR-483 |
| p1414 | down | 11 | A_25_P00010016 | hsa-miR-202 |
| p14290 | down | 110 | A_25_P00010955 | hsa-miR-1 |
| p3997 | down | 1309 | A_25_P00010943 | hsa-miR-567 |
| p118 | down | 51 | A_25_P00010284 | hsa-miR-362 |
| p8149 | down | 1116 | A_25_P00010190 | hsa-miR-133a |
| p6560 | down | 171 | A_25_P00010815 | hsa-miR-30c |
| p10648 | down | 60 | A_25_P00010486 | hsa-miR-135b |
| p12702 | down | 776 | A_25_P00011409 | hsa-miR-593 |
| p6139 | down | 129 | A_25_P00010183 | hsa-miR-381 |
| p12047 | down | 1292 | A_25_P00011124 | hsa-miR-633 |
| p11799 | down | 44 | A_25_P00010948 | hsa-miR-599 |
| p1663 | down | 71 | A_25_P00010061 | hsa-miR-376b |
| p4264 | down | 1244 | A_25_P00010718 | hsa-miR-222 |
| p13991 | down | 351 | A_25_P00010494 | hsa-miR-520d |
| p14494 | down | 1191 | A_25_P00010418 | hsa-miR-504 |
| p357 | down | 256 | A_25_P00011418 | hsa-miR-586 |
| p3700 | down | 208 | A_25_P00010789 | hsa-miR-369-5p |
| p8978 | down | 1361 | A_25_P00010889 | hsa-miR-519a |
| p926 | down | 523 | A_25_P00010730 | hsa-miR-92b |
| p10156 | down | 806 | A_25_P00010365 | hsa-miR-549 |
| p11019 | down | 666 | A_25_P00010755 | hsa-miR-34c |
| p11870 | down | 110 | A_25_P00010955 | hsa-miR-1 |
| p11775 | down | 499 | A_25_P00010309 | hsa-miR-544 |
| p2516 | down | 1079 | A_25_P00011061 | hsa-miR-511 |
| p11672 | down | 923 | A_25_P00010423 | hsa-miR-217 |
| p13660 | down | 1240 | A_25_P00011339 | hsa-miR-556 |
| p2354 | down | 871 | A_25_P00010263 | hsa-miR-328 |
| p8592 | down | 1361 | A_25_P00010889 | hsa-miR-519a |
| p13758 | down | 473 | A_25_P00010330 | hsa-miR-525 |
| p5664 | down | 428 | A_25_P00010172 | hsa-miR-521 |
| p11333 | down | 644 | A_25_P00011351 | hsa-miR-596 |
| p4826 | down | 1316 | A_25_P00011256 | hsa-miR-639 |
| p10994 | down | 238 | A_25_P00010175 | hsa-miR-519d |
| p10724 | down | 596 | A_25_P00011107 | hsa-miR-499 |
| p13585 | down | 879 | A_25_P00010728 | hsa-miR-92b |
| p764 | down | 436 | A_25_P00011221 | hsa-miR-553 |
| p11279 | down | 212 | A_25_P00010122 | hsa-miR-548b |
| p1563 | down | 768 | A_25_P00010149 | hsa-miR-539 |
| p398 | down | 300 | A_25_P00010030 | hsa-miR-337 |
| p1589 | down | 666 | A_25_P00010755 | hsa-miR-34c |
| p1958 | down | 911 | A_25_P00010774 | hsa-miR-449b |
| p11860 | down | 757 | A_25_P00010109 | hsa-miR-145 |
| p14817 | down | 653 | A_25_P00011621 | hsa-miR-641 |
| p9497 | down | 1472 | A_25_P00011060 | hsa-miR-511 |
| p9747 | down | 719 | A_25_P00011364 | hsa-miR-573 |
| p10237 | down | 913 | A_25_P00010503 | hsa-miR-205 |
| p6649 | down | 666 | A_25_P00010755 | hsa-miR-34c |
| p3076 | down | 931 | A_25_P00011247 | hsa-miR-802 |
| p13474 | down | 1251 | A_25_P00011375 | hsa-miR-649 |
| p10672 | down | 542 | A_25_P00011634 | hsa-miR-588 |
| p5993 | down | 1437 | A_25_P00010417 | hsa-miR-504 |
| p13343 | down | 165 | A_25_P00010099 | hsa-miR-380-3p |
| p3442 | down | 282 | A_25_P00010480 | hsa-miR-125a |
| p6247 | down | 130 | A_25_P00010488 | hsa-miR-518c |
| p7648 | down | 907 | A_25_P00010391 | hsa-miR-30b |
| p10483 | down | 845 | A_25_P00010110 | hsa-miR-145 |
| p14167 | down | 332 | A_25_P00010380 | hsa-miR-656 |
| p3752 | down | 1007 | A_25_P00010076 | hsa-miR-181d |
| p15075 | down | 56 | A_25_P00010670 | hsa-miR-326 |
| p2973 | down | 694 | A_25_P00010717 | hsa-miR-524 |
| p7595 | down | 383 | A_25_P00010450 | hsa-miR-620 |
| p13847 | down | 396 | A_25_P00011404 | hsa-miR-644 |
| p6289 | down | 815 | A_25_P00010360 | hsa-miR-485-3p |
| p5210 | down | 110 | A_25_P00010955 | hsa-miR-1 |
| p3664 | down | 812 | A_25_P00010166 | hsa-miR-519e |
| p7027 | down | 647 | A_25_P00010981 | hsa-miR-135a |
| p5324 | down | 540 | A_25_P00010657 | hsa-miR-503 |
| p12501 | down | 1400 | A_25_P00011227 | hsa-miR-655 |
| p12172 | down | 1061 | A_25_P00011362 | hsa-miR-643 |
| p5784 | down | 908 | A_25_P00010010 | hsa-miR-519b |
| p8884 | down | 448 | A_25_P00010396 | hsa-miR-625 |
| p11928 | down | 250 | A_25_P00010291 | hsa-miR-524 |
| p8503 | down | 1460 | A_25_P00011354 | hsa-miR-580 |
| p9160 | down | 515 | A_25_P00010632 | hsa-miR-571 |
| p12310 | down | 899 | A_25_P00010516 | hsa-miR-183 |
| p15242 | down | 18 | A_25_P00010514 | hsa-miR-577 |
| p9840 | down | 1244 | A_25_P00010718 | hsa-miR-222 |
| p8329 | down | 277 | A_25_P00010983 | hsa-miR-302a |
| p5942 | down | 320 | A_25_P00010901 | hsa-miR-611 |
| p14330 | down | 83 | A_25_P00010982 | hsa-miR-302a |
| p9503 | down | 1335 | A_25_P00010441 | hsa-miR-448 |
| p2688 | down | 583 | A_25_P00011219 | hsa-miR-553 |
| p8392 | down | 1339 | A_25_P00011306 | hsa-miR-769-5p |
| p14228 | down | 170 | A_25_P00010198 | hsa-miR-410 |
| p11941 | down | 383 | A_25_P00010450 | hsa-miR-620 |
| p1262 | down | 666 | A_25_P00010755 | hsa-miR-34c |
| p5913 | down | 341 | A_25_P00010207 | hsa-miR-592 |

Table S3

hub miRNAs in three modules

| royalblue module | lightyellow module | grey60 module |
| --- | --- | --- |
| hsa-miR-600  hsa-miR-628  hsa-miR-105  hsa-miR-454-3p  hsa-miR-376b  hsa-miR-616  hsa-miR-558  hsa-miR-542-3p  hsa-miR-616  hsa-miR-380-5p  hsa-miR-380-5p  hsa-miR-555  hsa-miR-452*  hsa-miR-606  hsa-miR-181a*  hsa-miR-421  hsa-miR-215  hsa-miR-647  hsa-miR-555  hsa-miR-138  hsa-miR-658  hsa-miR-516-5p  hsa-miR-526c  hsa-miR-421  hsa-miR-532  hsa-miR-515-5p  hsa-miR-496  hsa-miR-151  hsa-miR-766  hsa-miR-569  hsa-miR-633  hsa-miR-597  hsa-miR-488  hsa-miR-621  hsa-miR-802  hsa-miR-520b  hsa-miR-598  hsa-miR-631  hsa-miR-384  hsa-miR-380-5p | hsa-miR-671  hsa-miR-560  hsa-miR-671  hsa-miR-671  hsa-miR-560  hsa-miR-671  hsa-miR-671  hsa-miR-671  hsa-miR-610  hsa-miR-671  hsa-miR-610  hsa-miR-671  hsa-miR-610  hsa-miR-671  hsa-miR-617  hsa-miR-622  hsa-miR-584  hsa-miR-671  hsa-miR-671  hsa-miR-671  hsa-miR-671  hsa-miR-671  hsa-miR-584  hsa-miR-622  hsa-miR-610  hsa-miR-560  hsa-miR-671  hsa-miR-610  hsa-miR-610  hsa-miR-671  hsa-miR-560  hsa-miR-671  hsa-miR-560  hsa-miR-671  hsa-miR-560  hsa-miR-671  hsa-miR-610  hsa-miR-560  hsa-miR-610  hsa-miR-671 | hsa-miR-191*  hsa-miR-554  hsa-miR-636  hsa-miR-574  hsa-miR-605  hsa-miR-380-5p  hsa-miR-346  hsa-miR-448  hsa-miR-518c*  hsa-miR-621  hsa-miR-30e-3p  hsa-miR-597  hsa-miR-133a  hsa-miR-296  hsa-miR-191*  hsa-miR-488  hsa-miR-191  hsa-miR-149  hsa-miR-766  hsa-miR-424  hsa-miR-502  hsa-miR-92b  hsa-miR-636  hsa-miR-490  hsa-miR-504  hsa-miR-133a  hsa-miR-628  hsa-miR-153  hsa-miR-637  hsa-miR-597  hsa-miR-635  hsa-miR-512-3p  hsa-miR-151  hsa-miR-92b  hsa-miR-150  hsa-miR-33  hsa-miR-149  hsa-miR-433  hsa-miR-651  hsa-miR-496 |


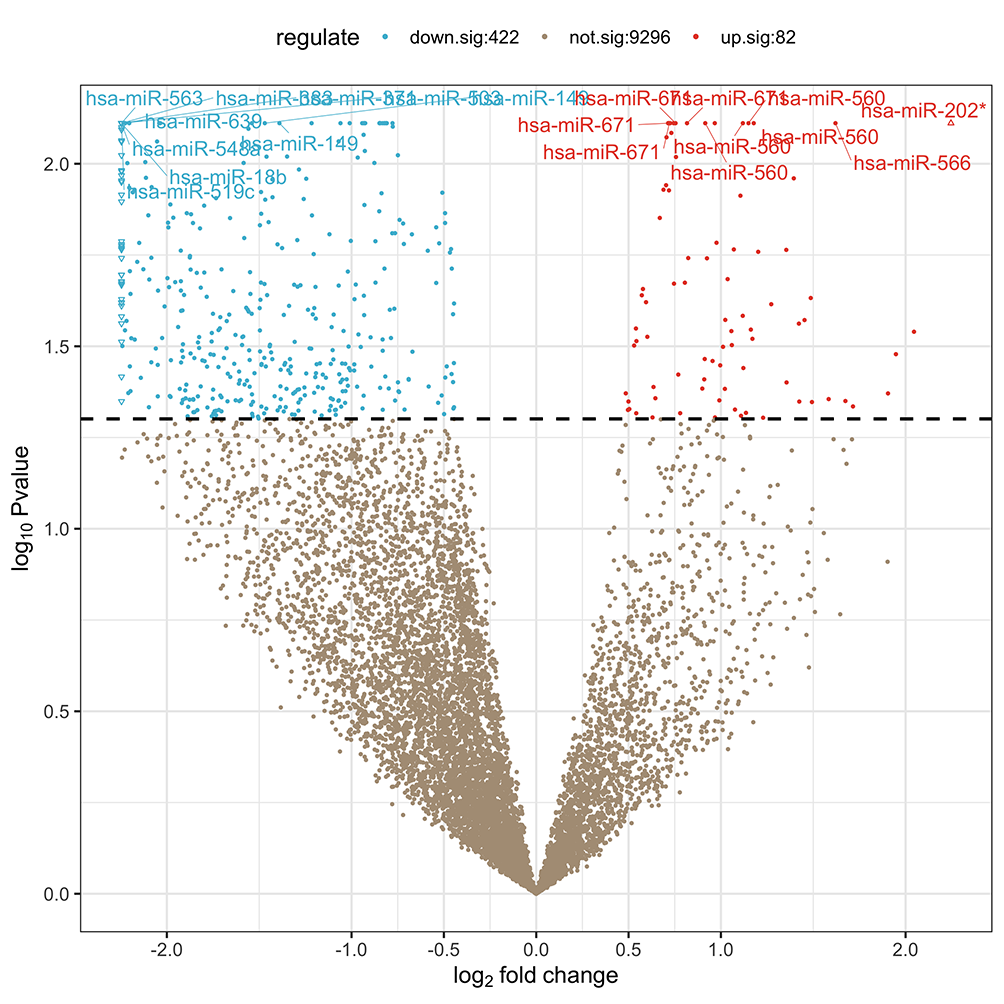


**Figure S1**: A volcano plots of miRNAs in COPD samples. compared with mild COPD samples, 422 DEMs were significantly downregulated and 82 DEMs were significantly upregulated in moderate COPD samples. Notes: Red: upregulation miRNAs; blue: downregulation miRNAs; tan: non-significantly differentially expressed miRNAs. Abbreviations: DEMs, differentially expressed miRNAs; COPD, chronic obstructive pulmonary disease


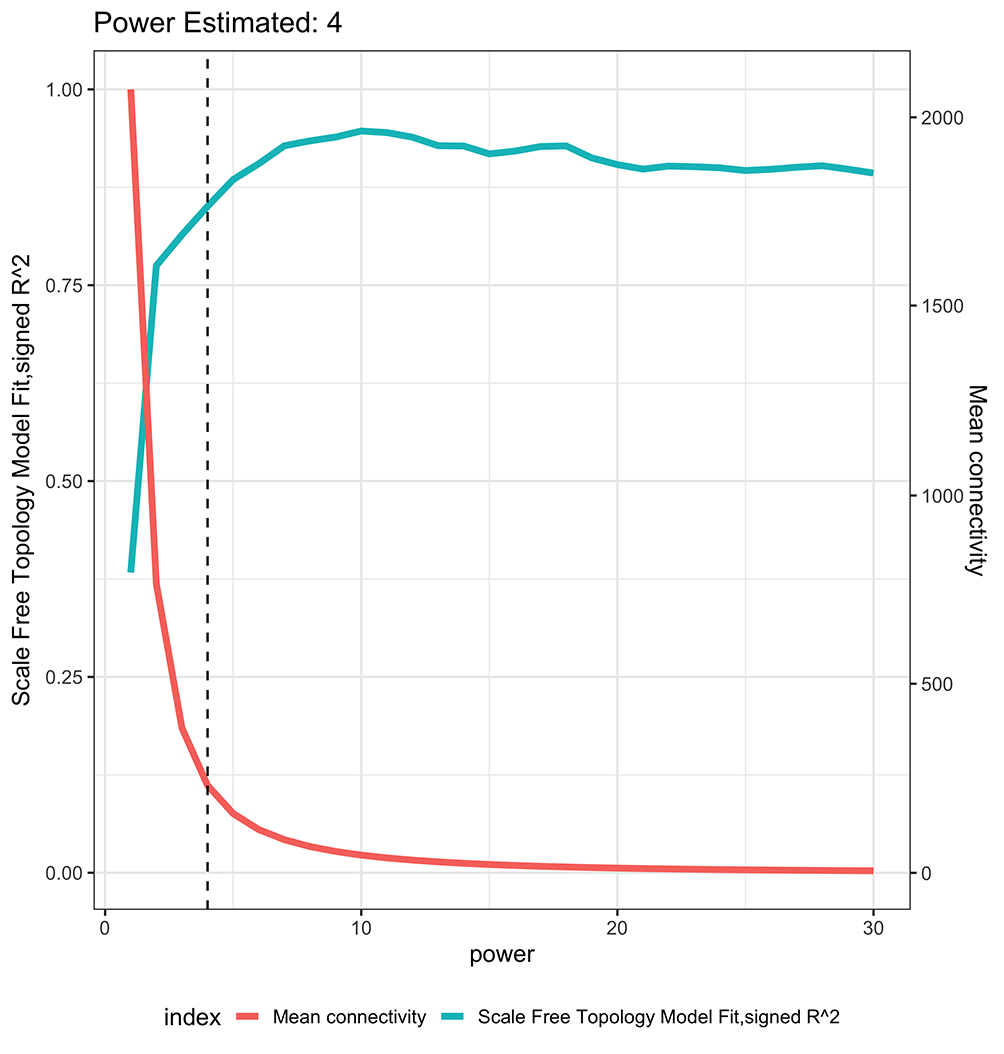


**Figure S2**: Scale-free topology criterion of the co-expression network. SFT plot for the power beta selection in the unsigned weighted correlation network. Green Line: SFT index R2 (left y-axis) as a function of different beta powers (x-axis). R2 tends to go up with higher powers, but the association is not strictly monotonic. Red Line: mean connectivity (right y-axis), a strictly decreasing function of the beta power (x-axis). Abbreviations: SFT (scale-free topology).


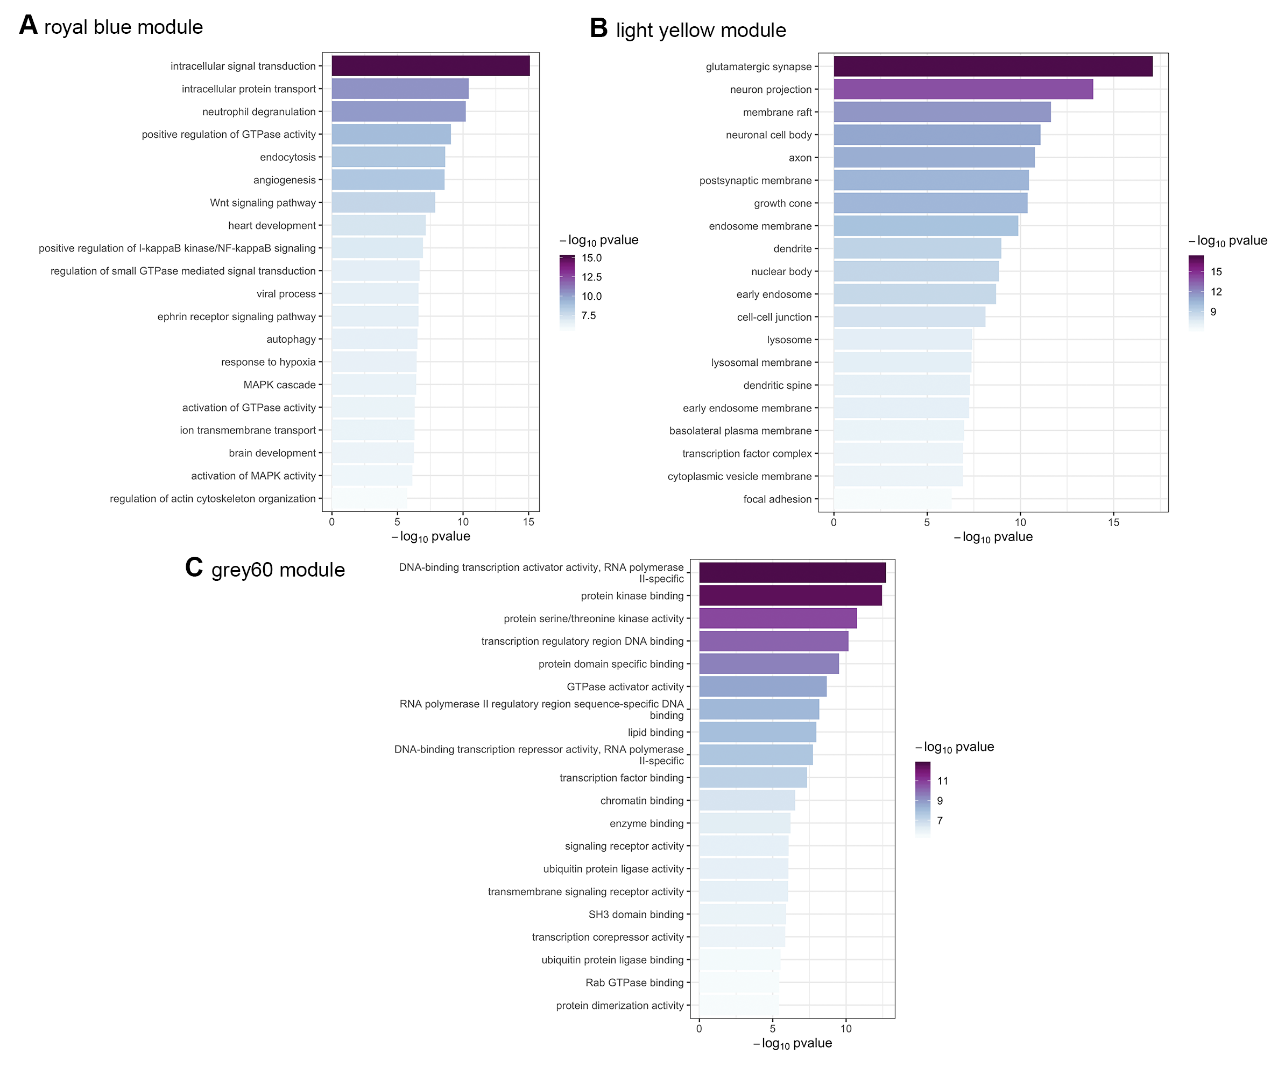


**Figure S3**: Functional enrichment analysis in royal blue model. (A) Functional annotations of Gene Ontology terms, biological process. (B) Functional annotations of Gene Ontology terms, cellular component. (C) Functional annotations of Gene Ontology terms, molecular function.


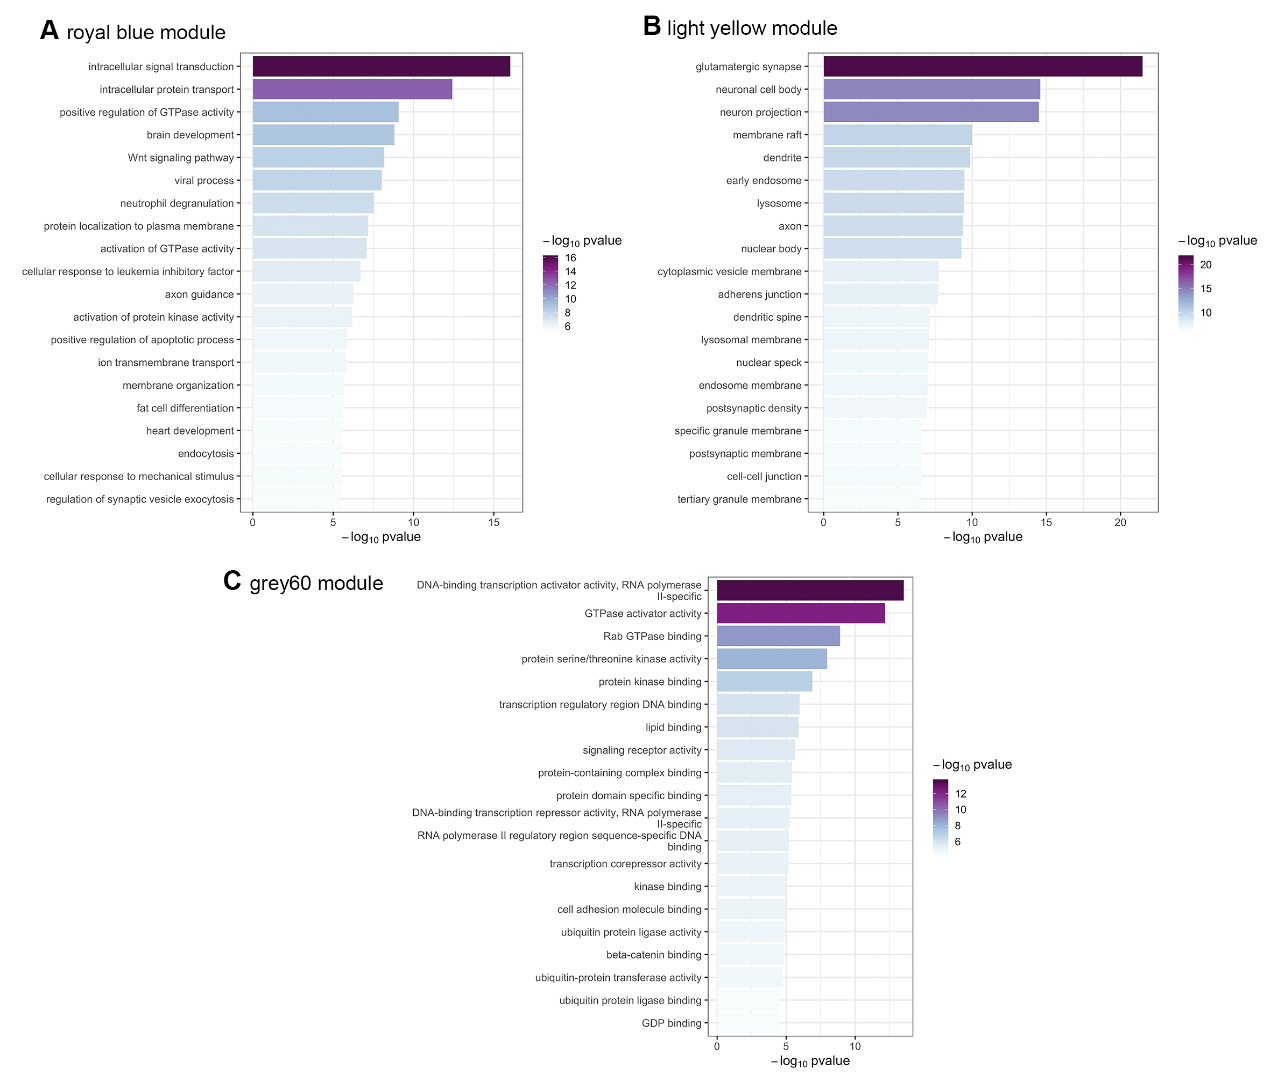


**Figure S4**: Functional enrichment analysis in light yellow model. (A) Functional annotations of Gene Ontology terms, biological process. (B) Functional annotations of Gene Ontology terms, cellular component. (C) Functional annotations of Gene Ontology terms, molecular function.


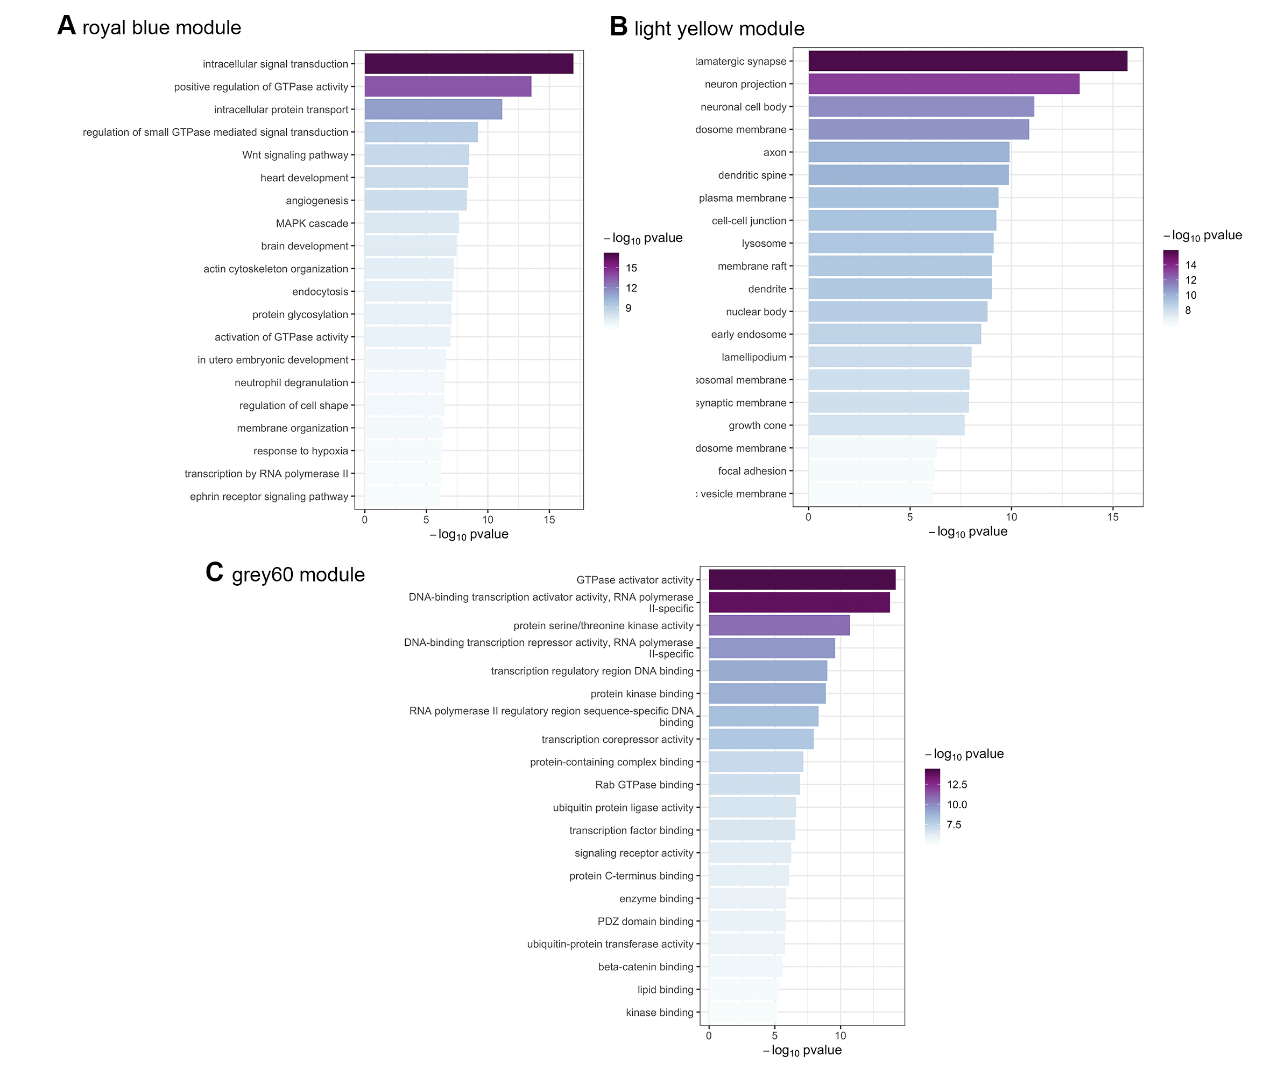


**Figure S5**: Functional enrichment analysis in grey60 model. (A) Functional annotations of Gene Ontology terms, biological process. (B) Functional annotations of Gene Ontology terms, cellular component. (C) Functional annotations of Gene Ontology terms, molecular function.
